# Supplementary material
Source: Springer Nature journal article supplement (https://www.springermedizin.de/resource/supplementary/12875_2010_503_MOESM2_ESM.pdf/9434748)
Supplement: MOESM2 [file 9434748]

# PRIMARY CARE SYSTEM FRAMEWORK

## Dimensions of the PC structure

Governance of PC system

Economic conditions of PC system

PC Workforce development

## Dimensions of the PC Process

Access to PC services

Comprehensiveness of PC services

Continuity of PC

Coordination of PC

## Dimensions of PC outcomes

Quality of PC

Efficiency of PC

Equity in health
